# Supplementary material for: Whole Genome Sequencing for Studying Bacillus anthracis from an Outbreak in the Abruzzo Region of Italy
Source: MDPI journal article supplement (doi:10.3390/microorganisms8010087), 2020-01-08
Supplement: s1 [file s1]

**Table S1.** Sequencing IDs, epidemiological information and references of all 91 *B. anthracis* strains used in this study

| ID               | Country      | Source      | Year | SNP_group            | Accession number | Reference  |
|------------------|--------------|-------------|------|----------------------|------------------|------------|
| 2016.AZ.3512.1.7 | Italy        | Goat        | 2016 | A_Br_011_009         | SRR10402317      | This study |
| A0264            | Turkey       | Human       | 1994 | A_Br_008_011         | SRR19994417      | [12]       |
| A0088            | South_Africa | /           | /    | A_Br_002_003         | SRR2968133       | [12]       |
| A0091            | South_Africa | /           | 1939 | B_Br_001_002         | SRR2968134       | [12]       |
| A0094            | South_Africa | /           | 1949 | A_Br_003_004         | SRR2968135       | [12]       |
| A0293            | Italy        | Sheep       | /    | A_Br_008_011         | SRR2968137       | [12]       |
| A0684            | China        | Soil        | 1982 | A_Br_008_011         | SRR2968138       | [12]       |
| A1035            | Albania      | Sheep       | /    | A_Br_008_011         | SRR2968140       | [12]       |
| A0002            | Turkey       | /           | /    | A_Br_002_003         | SRR2968144       | [12]       |
| A0656            | China        | Soil        | 1982 | A_Br_002_003         | SRR2968145       | [12]       |
| A1096            | Argentina    | Bovine      | /    | A_Br_003_004         | SRR2968148       | [12]       |
| A3716            | Namibia      | Zebra       | 2006 | A_Br_002_003         | SRR2968149       | [12]       |
| A0006            | Australia    | /           | /    | A_Br_005_006         | SRR2968150       | [12]       |
| A0017            | Zambia       | /           | /    | A_Br_005_006         | SRR2968151       | [12]       |
| A0026            | UK           | Equine      | 1992 | A_Br_005_006         | SRR2968152       | [12]       |
| A0062            | Poland       | /           | /    | A_Br_008_011         | SRR2968154       | [12]       |
| A0083            | Germany      | Soil        | /    | A_Br_002_003         | SRR2968155       | [12]       |
| A0224            | Australia    | Flies       | /    | A_Br_002_003         | SRR2968158       | [12]       |
| A0245            | Turkey       | Bovine      | /    | A_Br_008_011         | SRR2968159       | [12]       |
| A0252            | Zimbabwe     | /           | /    | A_Br_002_003         | SRR2968160       | [12]       |
| A0363            | Norway       | Bovine      | /    | A_Br_007             | SRR2968161       | [12]       |
| A0380            | UK           | wool        | /    | A_Br_007             | SRR2968162       | [12]       |
| A0386            | UK           | Human       | /    | A_Br_002_003         | SRR2968163       | [12]       |
| A0404            | India        | Human       | /    | A_Br_002_003         | SRR2968164       | [12]       |
| A0455            | Mozambique   | Bovine      | 1965 | A_Br_002_003         | SRR2968165       | [12]       |
| A0464            | Indonesia    | Bovine      | /    | A_Br_005_008_005_007 | SRR2968166       | [12]       |
| A0478            | Spain        | Environment | /    | A_Br_007             | SRR2968167       | [12]       |
| A0481            | Russia       | Vaccine     | /    | A_Br_008_011         | SRR2968168       | [12]       |
| A0530            | Botswana     | elephant    | /    | A_Br_005_006         | SRR2968170       | [12]       |
| A0533            | South_Africa | Goat        | /    | A_Br_005_006         | SRR2968171       | [12]       |
| A0615            | China        | Soil        | 1981 | A_Br_007             | SRR2968173       | [12]       |
| A0843            | Italy        | Sheep       | 1993 | A_Br_011_009         | SRR2968174       | [12]       |
| A0847            | Italy        | Sheep       | 1997 | A_Br_008_011         | SRR2968175       | [12]       |
| A0853            | Italy        | Bovine      | 1999 | A_Br_011_009         | SRR2968176       | [12]       |
| A0854            | Italy        | Bovine      | 1999 | A_Br_011_009         | SRR2968177       | [12]       |
| A0860            | Italy        | Sheep       | 1984 | A_Br_011_009         | SRR2968178       | [12]       |

|               |              |             |         |              |                                     |      |
|---------------|--------------|-------------|---------|--------------|-------------------------------------|------|
| A0862A        | Italy        | Sheep       | 1984    | A_Br_011_009 | SRR2968179                          | [12] |
| A0873         | Italy        | Bovine      | 1972    | A_Br_011_009 | SRR2968180                          | [12] |
| A0878         | Italy        | /           | /       | A_Br_011_009 | SRR2968181                          | [12] |
| A0881         | Italy        | Human       | /       | A_Br_011_009 | SRR2968182                          | [12] |
| A1058         | USA          | Bovine      | 1957    | A_Br_007     | SRR2968183                          | [12] |
| A1063         | USA          | /           | 1960    | A_Br_007     | SRR2968184                          | [12] |
| A1082         | Italy        | Bovine      | /       | A_Br_011_009 | SRR2968185                          | [12] |
| A2075         | Tanzania     | Baboon      | 1999    | A_Br_005_006 | SRR2968187                          | [12] |
| A2079         | Tanzania     | Impala      | 1999    | A_Br_005_006 | SRR2968188                          | [12] |
| A0001         | Turkey       | /           | /       | A_Br_002_003 | SRR2968189                          | [12] |
| A0081         | Germany      | Soil        | 1998    | A_Br_003_004 | SRR2968190                          | [12] |
| A0096         | South_Africa | /           | 1939    | A_Br_003_004 | SRR2968191                          | [12] |
| A0097         | South_Africa | /           | 1938    | A_Br_003_004 | SRR2968192                          | [12] |
| A0103         | Turkey       | Bovine      | /       | A_Br_002_003 | SRR2968193                          | [12] |
| A0148         | Turkey       | Human       | 1990    | A_Br_002_003 | SRR2968194                          | [12] |
| A1101         | Argentina    | Bovine      | /       | A_Br_003_004 | SRR2968195                          | [12] |
| A1102         | Argentina    | Pig         | /       | A_Br_003_004 | SRR2968196                          | [12] |
| A11193        | Bulgaria     | Bovine      | 1960_80 | A_Br_008_011 | SRR2968197                          | [12] |
| A0150         | Turkey       | Human       | 1995    | A_Br_008_011 | SRR2968200                          | [12] |
| A0303         | Canada       | Bovine      | /       | A_Br_009     | SRR2968201                          | [12] |
| A0362         | Norway       | Bovine      | /       | A_Br_008_011 | SRR2968203                          | [12] |
| A0401         | France       | Bovine      | /       | A_Br_011_009 | SRR2968204                          | [12] |
| A0417         | Hungary      | /           | /       | A_Br_008_011 | SRR2968172                          | [12] |
| A0675         | China        | Soil        | 1982    | A_Br_008_011 | SRR2968207                          | [12] |
| A0862B        | Italy        | Sheep       | 1984    | A_Br_011_009 | SRR2968209                          | [12] |
| A0891         | Italy        | Goat        | 1989    | A_Br_011_009 | SRR2968210                          | [12] |
| A0893         | Italy        | Goat        | 1996    | A_Br_011_009 | SRR2968211                          | [12] |
| A0894         | Italy        | Goat        | 1997    | A_Br_011_009 | SRR2968212                          | [12] |
| A1050         | Italy        | Bovine      | /       | A_Br_011_009 | SRR2968214                          | [12] |
| A3802         | Ivory coast  | Goat hide   | 2006    | A_Br_011_009 | SRR2968215                          | [12] |
| Shikan_NID    | Japan        | Equine      | 1928    | A_Br_001     | GCA_002356575.1_ASM235657v1         | [12] |
| RA3           | France       | Bovine      | 1997    | B_Br_004     | GCA_000832745.1_ASM83274v1          | [12] |
| A1144         | Argentina    | Bovine      | /       | A_Br_011_009 | GCA_000875715.1_ASM87571v1          | [12] |
| A1045         | USA          | Bovine      | 1952    | A_Br_001_002 | GCA_000008165.1_ASM816v1            | [12] |
| Ames_ancestor | USA          | Bovine      |         | A_Br_Ames    | GCA_000008445.1_ASM844v1            | [12] |
| BFV           | Jamaica      | Environment | /       | A_Br_001_002 | GCA_000742875.1_ASM74287v1          | [12] |
| K0021         | Italy        | Sheep       | /       | A_Br_011_009 | GCA_001273045.1_BANT008-SEQ-1-ASM-1 | [12] |
| A0937         | Thailand     | /           | /       | A_Br_001_002 | GCF_000007845.1_ASM784v1            | [12] |

|                       |              |             |         |              |                                 |      |
|-----------------------|--------------|-------------|---------|--------------|---------------------------------|------|
| <b>A1055</b>          | USA          | Soil        | 1956    | C_Br_A1055   | GCA_000167255.1_ASM16725v1      | [12] |
| <b>PAK-1</b>          | Pakistan     | Sheep       | 1978    | A_Br_008_011 | GCF_000832425.1_ASM83242v1      | [12] |
| <b>Canadian_bison</b> | USA          | Bison       | /       | A_Br_009     | GCA_000833125.1_ASM83312v1      | [12] |
| <b>Pasteur</b>        | UK           | Cat         | /       | A_Br_008_011 | GCA_000832585.1_ASM83258v1      | [12] |
| <b>BA1015</b>         | USA          | Bovine      | 1939    | A_Br_003_004 | GCA_000832665.1_ASM83266v1      | [12] |
| <b>2002013094</b>     | USA          | Environment | 1956    | C_Br_001     | GCA_000783235.1_ASM78323v1      | [12] |
| <b>Australia94</b>    | Australia    | Bovine      | 1994    | A_Br_Aust94  | GCA_000167235.1_ASM16723v1      | [12] |
| <b>Carbosap</b>       | Italy        | /           | 1940_45 | A_Br_011_009 | GCF_000310045.1_Carbosap_v1     | [12] |
| <b>3154</b>           | Bulgaria     | Soil        | 1960_80 | A_Br_008_011 | GCA_000319695.1_BA_3154assembly | [12] |
| <b>Kruger_B</b>       | South_Africa | /           | /       | B_Br_KrugerB | GCA_000167295.1_ASM16729v1      | [12] |
| <b>Tsiankovskii_I</b> | Russia       | Vaccine     | 1960    | A_Br_008_011 | GCF_000181675.2_ASM18167v2      | [12] |
| <b>Pollino</b>        | Italy        | Bovine      | /       | A_Br_011_009 | GCA_000831505.1_ASM83150v1      | [12] |
| <b>A4566</b>          | Denmark      | Human       | 2012    | A_Br_008_011 | SRR1999716                      | [12] |
| <b>A4568</b>          | Norway       | Human       | 2000    | A_Br_008_011 | SRR1999718                      | [12] |
| <b>A0696</b>          | China        | soil        | 1982    | A_Br_008_011 | SRR2968208                      | [12] |
| <b>A0033</b>          | China        | wool        | /       | A_Br_008_011 | SRR2968153                      | [12] |
| <b>K2129</b>          | China        | fur         | /       | A_Br_008_011 | LFYG01000000.1                  | [12] |
