# Supplementary material for: Whole Genome Sequencing for Studying Bacillus anthracis from an Outbreak in the Abruzzo Region of Italy
Source: MDPI journal article supplement (doi:10.3390/microorganisms8010087), 2020-01-08
Supplement: s1 [file s1]

**Table S2:** Plasmids detected in Italian *B. anthracis* strains

| ID               | pOX1_cya | pOX1_lef    | pOX1_pag | pOX1_repX | pOX2_capA | pOX2_capB | pOX2_capC | pOX2_capD | pOX2_capE | pOX2_repS | pOX1    | pOX2    |
|------------------|----------|-------------|----------|-----------|-----------|-----------|-----------|-----------|-----------|-----------|---------|---------|
| 2016.AZ.3512.1.7 | 100.00   | 100.00      | 100.00   | 100.00    | 100.00    | 100.00    | 100.00    | 100.00    | 100.00    | 100.00    | present | present |
| A0293            | 100.00   | 100.00      | 100.00   | 100.00    | 100.00    | 100.00    | 100.00    | 100.00    | 100.00    | 100.00    | present | present |
| A0843            | 100.00   | 100.00      | 100.00   | 100.00    | 100.00    | 100.00    | 100.00    | 100.00    | 100.00    | 100.00    | present | present |
| A0847            | 100.00   | 100.00      | 100.00   | 100.00    | 100.00    | 100.00    | 100.00    | 100.00    | 100.00    | 100.00    | present | present |
| A0853            | 100.00   | 100.00      | 100.00   | 100.00    | 100.00    | 100.00    | 100.00    | 100.00    | 100.00    | 100.00    | present | present |
| A0854            | 100.00   | 100.00      | 100.00   | 100.00    | 100.00    | 100.00    | 100.00    | 100.00    | 100.00    | 100.00    | present | present |
| A0860            | 100.00   | 100.00      | 100.00   | 100.00    | 100.00    | 100.00    | 100.00    | 100.00    | 100.00    | 100.00    | present | present |
| A0862A           | 100.00   | 100.00      | 100.00   | 100.00    | 100.00    | 100.00    | 100.00    | 100.00    | 100.00    | 100.00    | present | present |
| A0862B           | 100.00   | 49.55;53.21 | 100.00   | 100.00    | 100.00    | 100.00    | 100.00    | 100.00    | 100.00    | 100.00    | present | present |
| A0873            | 100.00   | 100.00      | 100.00   | 100.00    | 100.00    | 100.00    | 100.00    | 100.00    | 100.00    | 100.00    | present | present |
| A0878            | 0,00     | 0,00        | 0,00     | 0,00      | 0,00      | 0,00      | 0,00      | 0,00      | 0,00      | 0,00      | absent  | absent  |
| A0881            | 100.00   | 100.00      | 100.00   | 100.00    | 100.00    | 100.00    | 100.00    | 100.00    | 100.00    | 100.00    | present | present |
| A0891            | 100.00   | 100.00      | 100.00   | 100.00    | 100.00    | 100.00    | 100.00    | 100.00    | 100.00    | 100.00    | present | present |
| A0893            | 100.00   | 100.00      | 100.00   | 100.00    | 100.00    | 100.00    | 100.00    | 100.00    | 100.00    | 100.00    | present | present |
| A0894            | 100.00   | 100.00      | 100.00   | 100.00    | 100.00    | 100.00    | 100.00    | 100.00    | 100.00    | 100.00    | present | present |
| A1050            | 100.00   | 100.00      | 100.00   | 100.00    | 100.00    | 100.00    | 100.00    | 100.00    | 100.00    | 100.00    | present | present |
| Ames_ancestor    | 100.00   | 100.00      | 100.00   | 100.00    | 100.00    | 100.00    | 100.00    | 100.00    | 100.00    | 100.00    | present | present |
| Carbosap         | 100.00   | 100.00      | 100.00   | 100.00    | 100.00    | 100.00    | 100.00    | 100.00    | 100.00    | 100.00    | present | present |
| K0021            | 100.00   | 100.00      | 100.00   | 100.00    | 100.00    | 100.00    | 100.00    | 100.00    | 100.00    | 100.00    | present | present |
| Pollino          | 100.00   | 100.00      | 100.00   | 100.00    | 100.00    | 100.00    | 100.00    | 100.00    | 100.00    | 100.00    | present | present |
